# Supplementary material
Source: Elsevier journal article supplement (https://www.sciencedirect.com/science/article/pii/S2174204918300217)
Supplement: mmc2 [file S2174204918300217:mmc2.docx]

**Supplementary Table 2** Multivariate analysis (Cox regression) of predictors of cardiovascular mortality.

| Variables in the equation |  |  |  |  |  |  |
| --- | --- | --- | --- | --- | --- | --- |
| Predictors of CV mortality | B | SE | p | HR | 95% CI LL | 95% CI UL |
|
| Age at diagnosis >60 years | 1.675 | 0.518 | 0.001 | 5.340 | 1.934 | 14.745 |
| Family history of SCD | 1.131 | 0.464 | 0.015 | 3.098 | 1.248 | 7.689 |
| Systolic dysfunction | 1.177 | 0.555 | 0.034 | 3.245 | 1.093 | 9.637 |
| Obstructive HCM | 1.320 | 0.477 | 0,06 | 3.743 | 1.469 | 9.533 |

95% CI LL: lower limit of 95% confidence interval for hazard ratio; 95% CI UL: upper limit of 95% confidence interval for hazard ratio; B: beta; CV: cardiovascular; HCM: hypertrophic cardiomyopathy; HR: hazard ratio; SCD: sudden cardiac death; SE: standard error.
